# Supplementary material
Source: PubMed Central journal article supplement (PMC10765312)
Supplement: jamapsychiatry-e234948-s002.pdf [file jamapsychiatry-e234948-s002.pdf]

## Supplemental Online Content

Borrione L, Cavendish BA, Aparicio LVM, et al. Home-use transcranial direct current stimulation for the treatment of a major depressive episode: a randomized clinical trial. *JAMA Psychiatry*. Published online January 3, 2024. doi:10.1001/jamapsychiatry.2023.4948

### **eFigure 1. Transcranial direct current stimulation (tDCS) headset used in the Psylect trial**

**eList 1.** Usability VAS-Scales [0 (completely disagree) to 100 (completely agree)]

**eList 2.** Secondary scales

**eMethods.** Power calculations used for the Psylect trial

**eTable 1.** Baseline characteristics of the sample (complementary material)

**eFigure 2.** Participant distribution density heat map

**eTable 2.** Response and remission rates at endpoint

**eTable 3.** Secondary outcomes

**eTable 4.** MADRS at various timepoints

**eTable 5.** BDI-II at various timepoints

**eTable 6.** CGI-S at baseline and endpoint

**eTable 7.** CGI-I at endpoint

**eTable 8.** HAM-A at various timepoints

**eTable 9.** YMRS at various timepoints

**eTable 10.** PANAS negative at various timepoints

**eTable 11.** PANAS positive at various timepoints

**eTable 12.** STAI-S at various timepoints

**eTable 13.** STAI-T at various timepoints

**eTable 14.** Average usability scores at various time-points

**eTable 15.** Adverse events and serious adverse events at week 6

**eTable 16.** Individual adverse events at week 6

**eTable 17.** Adverse events per week

**eFigure 3.** tDCS stimulation time (average minutes per week per participant)

**eTable 18.** Reasons for dropout

## **References**

This supplemental material has been provided by the authors to give readers additional information about their work.

**eFigure 1. Transcranial direct current stimulation (tDCS) headset used in the Psylect trial.**

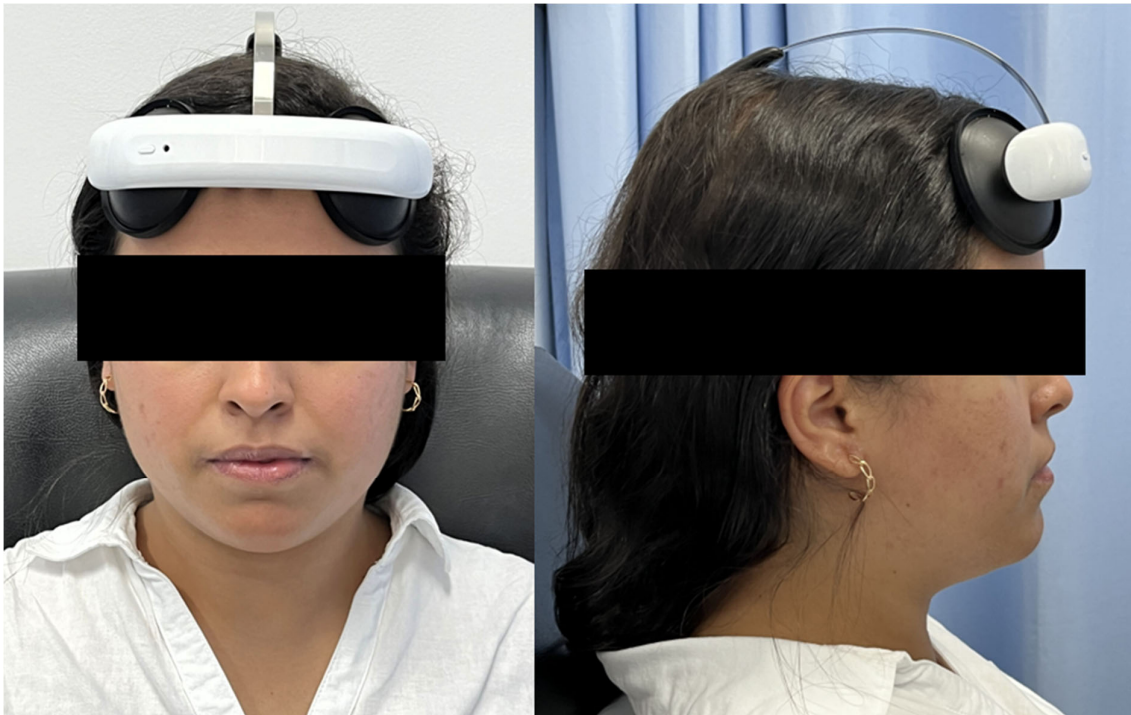

*Note.* Photograph depicting the Flow tDCS headset (Flow Neuroscience, Malmö, Sweden), frontal and right lateral view, on a member of our research team. The device is placed by the participants themselves, covering the entire forehead, with two circular electrodes, 10.5 cm apart and equally distant from the midline. For a more in-depth analysis of the electrical field distribution elicited by the equipment, please refer to Borrione, Suen [...] and Brunoni, 2020<sup>1</sup>.

## **eList 1. Usability VAS-Scales [0 (completely disagree) to 100 (completely agree)]**

1. VAS 1: “Placing the stimulation device on my head is easy and hassle-free” (*Device placement*).
2. VAS 2: “Turning on the Mobile tDCS device and connecting it to the smartphone app is quick and easy” (*Connectivity*).
3. VAS 3: “The smartphone app works well, with clear and objective explanations” (*DI app*).
4. VAS 4: “It's easy to complete the stimulation session in 30 minutes” (*Session completion*).
5. VAS 5: “It is easy to handle and store the stimulation device until the next session” (*Storage*).

## **eList2. Secondary scales**

- a. Montgomery-Asberg Depression Rating Scale (MADRS)<sup>2</sup> (range: 0-60; sign: positive; minimally significant score: 0-6, normal).
- b. Beck Depression Inventory-II (BDI-II)<sup>3</sup>, (range: 0-63; sign: positive; minimally significant score: 0-13, normal).
- c. Hamilton Anxiety Rating Scale<sup>4</sup>, (range: 0-56; sign: positive; minimally significant score: < 17, mild severity).
- d. Clinical Global Impression – Global Improvement (CGI-I) scale<sup>5</sup>, (range: 1-7; sign: positive; minimally significant score: 1-3 denotes improvement).
- e. Clinical Global Impression – Severity of Illness (CGI-S) scale<sup>5</sup>, (range: 1-7; sign: positive; minimally significant score: 1, normal).
- f. Positive and Negative Affect Rating Scale (PANAS)<sup>6</sup>, (range: 10-50; sign: positive; minimally significant score: NA).
- g. State-Trait Anxiety Inventory (STAI-T and STAI-S)<sup>7</sup>, (range: 20-80; sign: positive; minimally significant score: >39).

## eMethods. Power calculations used for the Psylect trial.

### 1.1 R code used in power calculations

```
pl <- study_parameters(n1 = 4,
  n2 = 90,
  sigma_subject_intercept = 5,
  fixed_slope_T = 0.2,
  sigma_error = 3,
  dropout = dropout_weibull(proportion = 0.10, rate = 1/2),
  effect_size = cohenD(-0.4, standardizer = "pretest_SD"))
```

```
x <- get_power_table(pl,
  n2 = seq(10, 100, by = 1),
  alpha = 0.05/3)
```

Note. Power calculations using the R lmpackage <sup>8</sup>.

### 1.2 Power analysis graphs

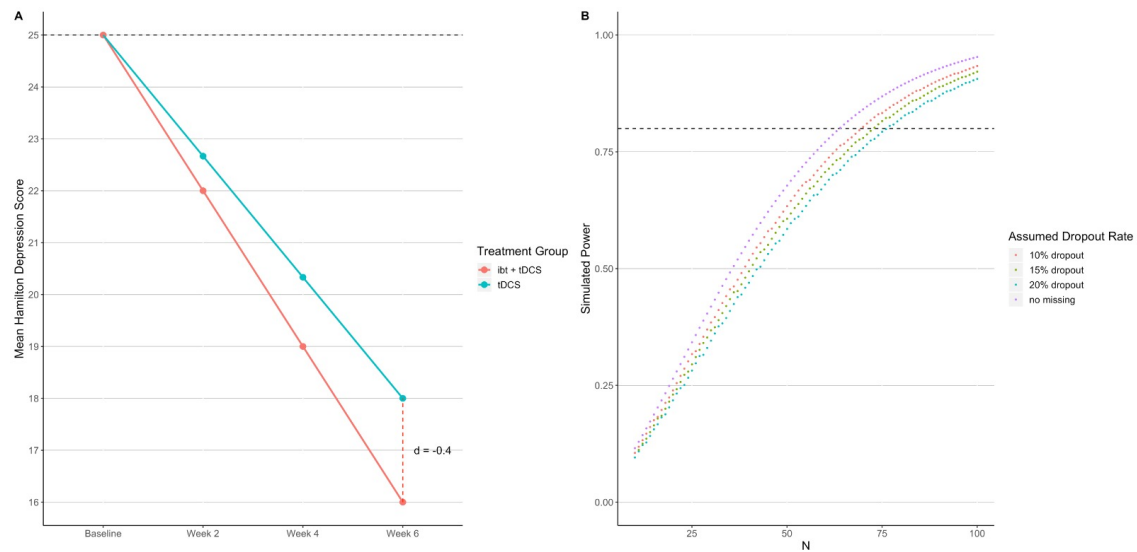

### 1.3 Power simulation for LMM difference in change over 4 measurements

| No Missings |       | 10% Dropout |       | 15% Dropout |       | 20% Dropout |       |
|-------------|-------|-------------|-------|-------------|-------|-------------|-------|
| N per arm   | Power |
|             |       |             |       |             |       |             |       |

|    |           |     |    |                  |     |    |           |     |    |           |     |
|----|-----------|-----|----|------------------|-----|----|-----------|-----|----|-----------|-----|
| 60 | 0.7707597 | 120 | 60 | 0.7284625        | 120 | 60 | 0.7065739 | 120 | 60 | 0.6799924 | 120 |
| 61 | 0.7787619 | 122 | 61 | 0.7376030        | 122 | 61 | 0.7137958 | 122 | 61 | 0.6903468 | 122 |
| 62 | 0.7865369 | 124 | 62 | 0.7465027        | 124 | 62 | 0.7228745 | 124 | 62 | 0.7004514 | 124 |
| 63 | 0.7940883 | 126 | 63 | 0.7551642        | 126 | 63 | 0.7321604 | 126 | 63 | 0.7041013 | 126 |
| 64 | 0.8014197 | 128 | 64 | 0.7635903        | 128 | 64 | 0.7359779 | 128 | 64 | 0.7113371 | 128 |
| 65 | 0.8085349 | 130 | 65 | 0.7670782        | 130 | 65 | 0.7449205 | 130 | 65 | 0.7209223 | 130 |
| 66 | 0.8154377 | 132 | 66 | 0.7751739        | 132 | 66 | 0.7536244 | 132 | 66 | 0.7302624 | 132 |
| 67 | 0.8221322 | 134 | 67 | 0.781051<br>oi 3 | 134 | 67 | 0.7620924 | 134 | 67 | 0.7393595 | 134 |
| 68 | 0.8286222 | 136 | 68 | 0.7887519        | 136 | 68 | 0.7703274 | 136 | 68 | 0.7430653 | 136 |
| 69 | 0.8349120 | 138 | 69 | 0.7962308        | 138 | 69 | 0.7762844 | 138 | 69 | 0.7518228 | 138 |
| 70 | 0.8410056 | 140 | 70 | 0.8034914        | 140 | 70 | 0.7795864 | 140 | 70 | 0.7581359 | 140 |
| 71 | 0.8469072 | 142 | 71 | 0.8105376        | 142 | 71 | 0.7873295 | 142 | 71 | 0.7660811 | 142 |
| 72 | 0.8526211 | 144 | 72 | 0.8173733        | 144 | 72 | 0.7948501 | 144 | 72 | 0.7742099 | 144 |
| 73 | 0.8581514 | 146 | 73 | 0.8240023        | 146 | 73 | 0.8018142 | 146 | 73 | 0.7775101 | 146 |
| 74 | 0.8635024 | 148 | 74 | 0.8304287        | 148 | 74 | 0.8089111 | 148 | 74 | 0.7853167 | 148 |
| 75 | 0.8686784 | 150 | 75 | 0.8330723        | 150 | 75 | 0.8157965 | 150 | 75 | 0.7928994 | 150 |
| 76 | 0.8736835 | 152 | 76 | 0.8392174        | 152 | 76 | 0.8224742 | 152 | 76 | 0.7983533 | 152 |
| 77 | 0.8785219 | 154 | 77 | 0.8449066        | 154 | 77 | 0.8235078 | 154 | 77 | 0.8055563 | 154 |

|    |           |     |    |           |     |    |           |     |    |           |     |
|----|-----------|-----|----|-----------|-----|----|-----------|-----|----|-----------|-----|
| 78 | 0.8831980 | 156 | 78 | 0.8506792 | 156 | 78 | 0.8299505 | 156 | 78 | 0.8084733 | 156 |
| 79 | 0.8877158 | 158 | 79 | 0.8548513 | 158 | 79 | 0.8361942 | 158 | 79 | 0.8150417 | 158 |
| 80 | 0.8920794 | 160 | 80 | 0.8603050 | 160 | 80 | 0.8422430 | 160 | 80 | 0.8217465 | 160 |

---

*Note: Power simulation for LMM difference in change over 4 measurements (continuous linear change) between treatment arms with an assumed ES of  $d = -0.4$  at endpoint and monotonically increasing drop-out rates following the Weibull distribution. Dropouts were assumed to be equally distributed over treatment arms. Measurements are considered as nested within subjects. To adequately power all possible combinations of the 3-arm trial, obtained  $N$  per arm for the smallest detectable group differences ( $d_{tdcs \text{ vs. combination}} = -0.4$ ,  $d_{\text{placebo vs. tdcs}} = -0.4$ ) are multiplied by 3. Significance levels were Bonferroni corrected for 3-way pairwise comparisons ( $\alpha = 0.05/3$ ).*

**eTable 1. Baseline characteristics of the sample (complementary material).**

|                                      | Double-Active (N=64) | tDCS-only (N=73) | Double-Sham (N=73) | Total (N=210) |
|--------------------------------------|----------------------|------------------|--------------------|---------------|
| <b>Demographic characteristics</b>   |                      |                  |                    |               |
| Sex (% female)                       | 54 (84)              | 68 (93)          | 58 (79)            | 180 (86)      |
| Age, y                               | 38.7 ± 10.1          | 38.8 ± 9.1       | 39.2 ± 8.8         | 38.9 ± 9.3    |
| Marital status (% not married)       | 39 (61)              | 49 (67)          | 51 (70)            | 139 (66)      |
| Completed graduate school (%)        | 40 (63)              | 57 (78)          | 51 (70)            | 148 (70)      |
| Ethnicity (% white)                  | 48 (75)              | 54 (74)          | 50 (68)            | 152 (72)      |
| Income (% ≤ 5 minimum wages)         | 33 (52)              | 43 (59)          | 43 (59)            | 119 (57)      |
| Currently working - no. (%)          | 36 (56)              | 47 (64)          | 58 (79)            | 141 (67)      |
| Religion (% no religion)             | 21 (33)              | 26 (36)          | 32 (44)            | 79 (38)       |
| <b>Clinical characteristics</b>      |                      |                  |                    |               |
| Body mass index (kg/m <sup>2</sup> ) | 27.6 ± 5.7           | 28.1 ± 6.5       | 27.3 ± 5.7         | 27.6 ± 6.0    |
| Head circumference, cm               | 55.4 ± 3.8           | 55.9 ± 1.6       | 56.2 ± 1.9         | 55.8 ± 2.5    |
| Right-handedness (%)                 | 59 (92)              | 66 (90)          | 66 (90)            | 191 (91)      |
| Physical activity (% sedentary)      | 44 (69)              | 51 (70)          | 54 (74)            | 149 (71)      |
| Smoking status (% smokers)           | 11 (17)              | 10 (14)          | 8 (11)             | 29 (14)       |
| Alcohol use (% social use)           | 28 (44)              | 45 (62)          | 51 (70)            | 124 (59)      |
| Systemic hypertension (%)            | 8 (12)               | 9 (12)           | 4 (5)              | 21 (10)       |
| Hypothyroidism (%)                   | 8 (13)               | 12 (16)          | 7 (10)             | 27 (13)       |
| Diabetes mellitus (%)                | 5 (8)                | 4 (5)            | 0 (0)              | 9 (4)         |
| <b>Other secondary scales</b>        |                      |                  |                    |               |
| CGI-S, mean (SD)                     | 4.5 ± 0.6            | 4.3 ± 0.7        | 4.5 ± 0.7          | 4.4 ± 0.7     |



|                         |            |                      |            |            |
|-------------------------|------------|----------------------|------------|------------|
| <b>HAM-A, mean (SD)</b> | 32.7 ± 8.9 | 32.9 ± 8.5           | 31.5 ± 8.1 | 32.4 ± 8.5 |
| <b>PANAS negative</b>   | 32.1 ± 6.2 | 32.8 ± 7.8<br>(n=72) | 31.8 ± 7.6 | 32.3 ± 7.3 |
| <b>PANAS positive</b>   | 16.7 ± 4.5 | 16.6 ± 4.4<br>(n=72) | 17.8 ± 5.6 | 17.1 ± 4.9 |
| <b>STAI-S</b>           | 60.8 ± 8.2 | 61.3 ± 10.0          | 61.0 ± 9.6 | 61.0 ± 9.3 |
| <b>STAI-T</b>           | 64.4 ± 5.5 | 64.6 ± 7.2           | 64.5 ± 7.8 | 64.5 ± 6.9 |

Plus-minus values are means ± SD. Clinical Global Impression-S (severity)<sup>5</sup>, (range: 1-7; sign: positive; minimally significant score: 1, normal). HAM-A: Hamilton Anxiety Scale <sup>4</sup>, (range: 0-56; sign: positive; minimally significant score: < 17, mild severity). PANAS: Positive and Negative Affect Scale<sup>6</sup>, (range: 10-50; sign: positive; minimally significant score: NA). STAI: State-Trait Anxiety Scale <sup>7</sup>, (range: 20-80; sign: positive; minimally significant score: >39). tDCS: transcranial direct current stimulation.

**eFigure 2. Participant distribution density heat map**

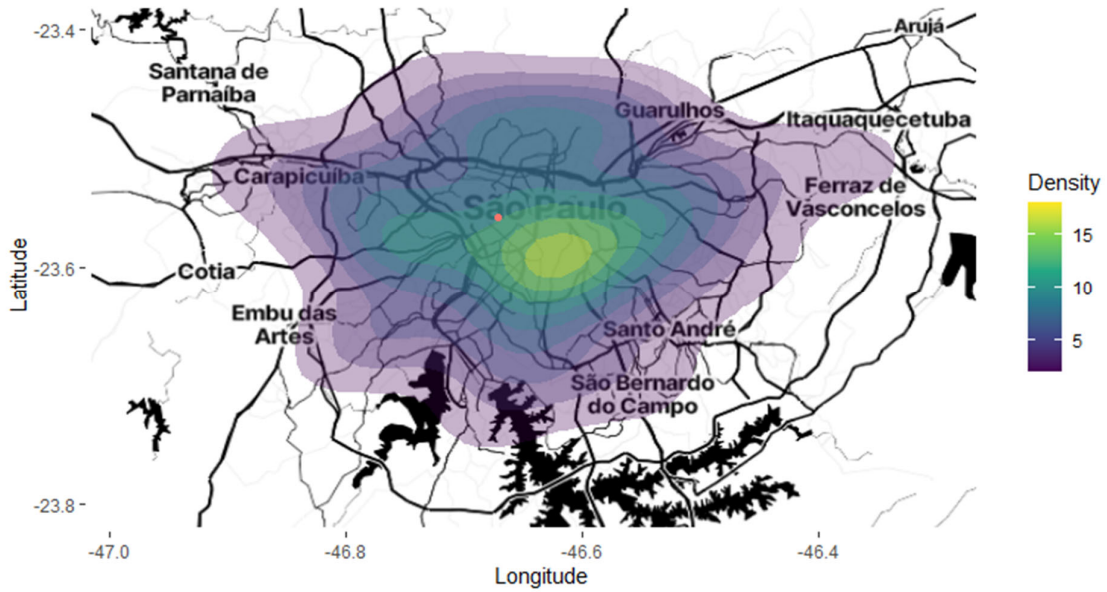

*Note.* Heat map showing participant distribution density over the greater area of São Paulo, Brazil. The red dot represents the study center (Instituto de Psiquiatria - HC/FMUSP, Rua Dr. Ovídio Pires de Campos, 785 CEP 05403-903, São Paulo - SP, Brazil).

**eTable 2. Response and remission rates at endpoint.**

|                  | N (%)         |              |              | Double-Active vs. tDCS-only |         | Double-Active vs. Double-Sham |         | tDCS-only vs. Double-Sham |         |
|------------------|---------------|--------------|--------------|-----------------------------|---------|-------------------------------|---------|---------------------------|---------|
|                  | Double-Active | tDCS-only    | Double-Sham  | OR                          | P-value | OR                            | P-value | OR                        | P-value |
| <b>Response</b>  | 20<br>(31.3)  | 26<br>(35.6) | 28<br>(38.4) | 0.81                        | 0.56    | 0.71                          | 0.34    | 0.89                      | 0.73    |
| <b>Remission</b> | 9 (14.1)      | 13<br>(17.8) | 15 (20.6)    | 0.75                        | 0.54    | 0.62                          | 0.31    | 0.84                      | 0.67    |

Note: Logistic regression model. OR Odds-ratio.

**eTable 3. Secondary outcomes**

| Characteristic        | Change until week 6       |                          |                           |
|-----------------------|---------------------------|--------------------------|---------------------------|
|                       | Double- Active            | tDCS-only                | Double- Sham              |
| <b>BDI</b>            | -13.38 (-16.29 to -10.46) | -14.5 (-17.28 to -11.72) | -12.73 (-15.48 to -9.99)  |
| <b>MADRS</b>          | -9.82 (-12.27 to -7.36)   | -10.71 (-13.04 to -8.38) | -8.79 (-11.09 to -6.48)   |
| <b>CGI-S</b>          | -1.12 (-1.41 to -0.83)    | -1.18 (-1.45 to -0.9)    | -1.2 (-1.48 to -0.93)     |
| <b>HAM-A</b>          | -15.84 (-18.07 to -13.62) | -17.11 (-19.2 to -15.01) | -14.78 (-16.87 to -12.69) |
| <b>PANAS negative</b> | -8.64 (-10.53 to -6.76)   | -11.31 (-13.1 to -9.52)  | -9.16 (-10.93 to -7.39)   |
| <b>PANAS positive</b> | 5.37 (3.45 to 7.29)       | 3.62 (1.79 to 5.45)      | 3.93 (2.12 to 5.73)       |
| <b>STAI-S</b>         | -8.6 (-11.84 to -5.37)    | -10.77 (-13.83 to -7.7)  | -9.2 (-12.25 to -6.16)    |
| <b>STAI-T</b>         | -10.46 (-13.04 to -7.88)  | -10.49 (-12.94 to -8.04) | -10.67 (-13.1 to -8.24)   |

*Note.* HDRS-17 Hamilton Depression Rating Scale; BDI Beck Depression Inventory; MADRS Montgomery-Åsberg Depression Rating Scale; CGI Clinical Global Impression; HAM-A Hamilton Anxiety Rating Scale; PANAS Positive and Negative Affect Scale; STAI State-Trait Anxiety Inventory; tDCS: mobile transcranial direct current stimulation. Values are mean changes in scores with 95% confidence intervals in parentheses.

**eTable 4. MADRS at various timepoints.**

| Group                               | Baseline              | Week 2                | Week 3                | Week 4                | Week 6                |
|-------------------------------------|-----------------------|-----------------------|-----------------------|-----------------------|-----------------------|
| <b>Double-Active</b>                | 29.9 ± 5.7            | 21.4 ± 6.9            | 19.9 ± 8.0            | 20.1 ± 8.6            | 19.8 ± 9.2            |
| <b>tDCS-only</b>                    | 30.3 ± 6.1            | 22.2 ± 8.5            | 20.1 ± 9.1            | 20.4 ± 8.3            | 18.6 ± 10.0           |
| <b>Double-Sham</b>                  | 29.9 ± 5.7            | 21.3 ± 9.0            | 20.9 ± 9.0            | 20.5 ± 10.3           | 20.3 ± 11.0           |
| <b>Contrasts</b>                    |                       |                       |                       |                       |                       |
| <b>Double-Active vs Double-Sham</b> | -0.02 (-1.99 to 1.95) | -0.36 (-2.41 to 1.69) | -0.53 (-2.84 to 1.78) | -0.7 (-3.36 to 1.95)  | -1.05 (-4.57 to 2.47) |
| <b>Double-Active vs tDCS-only</b>   | -0.82 (-2.79 to 1.15) | -0.52 (-2.58 to 1.54) | -0.37 (-2.69 to 1.94) | -0.23 (-2.89 to 2.44) | 0.07 (-3.46 to 3.6)   |
| <b>tDCS-only vs Double-Sham</b>     | 0.8 (-1.1 to 2.71)    | 0.16 (-1.83 to 2.15)  | -0.16 (-2.4 to 2.08)  | -0.48 (-3.06 to 2.1)  | -1.12 (-4.54 to 2.3)  |

*Note.* MADRS: Montgomery-Åsberg Depression Rating Scale (range: 0-60; sign: positive; minimally significant score: 0-6, normal)

<sup>2</sup>. The upper half shows mean ± SD across weeks. The lower half shows group contrasts (differences in estimated marginal means) with their respective 95% confidence interval based on a linear mixed-effects regression.

**eTable 5. BDI-II at various timepoints.**

| Group                               | Baseline              | Week 2                | Week 3                | Week 4                | Week 6                |
|-------------------------------------|-----------------------|-----------------------|-----------------------|-----------------------|-----------------------|
| <b>Double-Active</b>                | 36.5 ± 7.4            | 26.1 ± 10.2           | 25.0 ± 11.2           | 23.7 ± 11.1           | 23.0 ± 11.6           |
| <b>tDCS-only</b>                    | 36.1 ± 8.7            | 26.9 ± 11.5           | 26.4 ± 11.7           | 24.2 ± 11.6           | 20.4 ± 11.4           |
| <b>Double-Sham</b>                  | 36.1 ± 8.8            | 26.6 ± 12.8           | 26.4 ± 12.6           | 23.9 ± 14.0           | 22.6 ± 14.0           |
| <b>Contrasts</b>                    |                       |                       |                       |                       |                       |
| <b>Double-Active vs Double-Sham</b> | -0.03 (-3.01 to 2.96) | -0.24 (-3.29 to 2.8)  | -0.35 (-3.63 to 2.93) | -0.46 (-4.08 to 3.17) | -0.67 (-5.2 to 3.86)  |
| <b>Double-Active vs tDCS-only</b>   | -0.74 (-3.72 to 2.24) | -0.37 (-3.41 to 2.68) | -0.18 (-3.47 to 3.11) | 0.01 (-3.63 to 3.64)  | 0.38 (-4.17 to 4.93)  |
| <b>tDCS-only vs Double-Sham</b>     | 0.71 (-2.17 to 3.6)   | 0.12 (-2.82 to 3.07)  | -0.17 (-3.35 to 3.01) | -0.46 (-3.99 to 3.06) | -1.05 (-5.46 to 3.36) |

*Note.* BDI-II: Beck Depression Inventory-Second Edition <sup>3</sup> (range: 0-63; sign: positive; minimally significant score: 0-13, normal). The upper half shows mean ± SD across weeks. The lower half shows group contrasts (differences in estimated marginal means) with their respective 95% confidence interval based on a linear mixed-effects regression.

**eTable 6. CGI-S at baseline and endpoint.**

| <b>Group</b>         | <b>Baseline</b> | <b>Week 6</b> |
|----------------------|-----------------|---------------|
| <b>Double-Active</b> | 4.5 ± 0.6       | 3.4 ± 1.1     |
| <b>tDCS-only</b>     | 4.3 ± 0.7       | 3.1 ± 1.2     |
| <b>Double-Sham</b>   | 4.5 ± 0.7       | 3.3 ± 1.4     |

*Note.* CGI-S: Clinical Global Impression scale - Severity of illness (range: 1-7; sign: positive; minimally significant score: 1, normal)  
<sup>5</sup>. Values are means ± SD.

**eTable 7. CGI-I at endpoint.**

| <b>Group</b>         | <b>Week 6</b> |
|----------------------|---------------|
| <b>Double-Active</b> | 2.70 ± 1.13   |
| <b>tDCS-only</b>     | 2.65 ± 1.08   |
| <b>Double-Sham</b>   | 2.75 ± 1.42   |

*Note.* CGI-I: Clinical Global Impression scale - Global Improvement (range: 1-7; sign: positive; minimally significant score: 1-3 denotes improvement)<sup>5</sup>. Values are means ± SD.



**eTable 8. HAM-A at various timepoints.**

| <b>Group</b>         | <b>Baseline</b> | <b>Week 2</b> | <b>Week 3</b> | <b>Week 4</b> | <b>Week 6</b> |
|----------------------|-----------------|---------------|---------------|---------------|---------------|
| <b>Double-Active</b> | 32.7 ± 8.9      | -             | 20.8 ± 10.6   | -             | 16.9 ± 8.5    |
| <b>tDCS-only</b>     | 33.0 ± 8.5      | -             | 22.0 ± 9.9    | -             | 15.8 ± 8.8    |
| <b>Double-Sham</b>   | 31.5 ± 8.1      | -             | 20.7 ± 9.8    | -             | 16.8 ± 9.0    |

*Note.* HAM-A: Hamilton Anxiety Rating Scale (range: 0-56; sign: positive; minimally significant score: < 17, mild severity)<sup>4</sup>. Values are means ± SD.

**eTable 9. YMRS at various timepoints.**

| <b>Group</b>         | <b>Baseline</b> | <b>Week 2</b> | <b>Week 3</b> | <b>Week 4</b> | <b>Week 6</b> |
|----------------------|-----------------|---------------|---------------|---------------|---------------|
| <b>Double-Active</b> | -               | 1.5 ± 2.0     | 1.5 ± 1.8     | 1.3 ± 1.6     | 1.0 ± 1.7     |
| <b>tDCS-only</b>     | -               | 1.3 ± 1.7     | 1.6 ± 1.8     | 1.2 ± 1.6     | 0.4 ± 1.0     |
| <b>Double-Sham</b>   | -               | 1.4 ± 1.6     | 1.6 ± 1.3     | 1.4 ± 1.8     | 0.8 ± 1.3     |

*Note.* YMRS: Young Mania Rating Scale (range: 0-58; sign: positive; minimally significant score: < 13, normal)<sup>9</sup>. Values are means ± SD.

**eTable 10. PANAS negative at various timepoints.**

| <b>Group</b>         | <b>Baseline</b> | <b>Week 2</b> | <b>Week 3</b> | <b>Week 4</b> | <b>Week 6</b> |
|----------------------|-----------------|---------------|---------------|---------------|---------------|
| <b>Double-Active</b> | 32.1 ± 6.2      | -             | 24.7 ± 7.9    | -             | 23.5 ± 8.6    |
| <b>tDCS-only</b>     | 32.9 ± 7.8      | -             | 25.2 ± 8.6    | -             | 21.5 ± 7.5    |
| <b>Double-Sham</b>   | 31.8 ± 7.6      | -             | 24.8 ± 7.4    | -             | 22.5 ± 8.4    |

*Note.* PANAS: Positive and Negative Affect Schedule (range: 10-50; sign: positive; minimally significant score: NA)<sup>6</sup>. Values are means ± SD.

**eTable 11. PANAS positive at various timepoints.**

| <b>Group</b>         | <b>Baseline</b> | <b>Week 2</b> | <b>Week 3</b> | <b>Week 4</b> | <b>Week 6</b> |
|----------------------|-----------------|---------------|---------------|---------------|---------------|
| <b>Double-Active</b> | 16.7 ± 4.5      | -             | 19.9 ± 6.0    | -             | 22.1 ± 7.2    |
| <b>tDCS-only</b>     | 16.6 ± 4.4      | -             | 18.6 ± 5.8    | -             | 20.2 ± 7.0    |
| <b>Double-Sham</b>   | 17.8 ± 5.6      | -             | 20.1 ± 6.8    | -             | 21.8 ± 8.1    |

*Note.* PANAS: Positive and Negative Affect Schedule <sup>6</sup> (range: 10-50; sign: positive; minimally significant score: NA). Values are means ± SD.

**eTable 12. STAI-S at various timepoints.**

| <b>Group</b>         | <b>Baseline</b> | <b>Week 2</b> | <b>Week 3</b> | <b>Week 4</b> | <b>Week 6</b> |
|----------------------|-----------------|---------------|---------------|---------------|---------------|
| <b>Double-Active</b> | 60.8 ± 8.2      | -             | 55.2 ± 10.8   | -             | 52.2 ± 12.3   |
| <b>tDCS-only</b>     | 61.3 ± 10.0     | -             | 56.0 ± 12.1   | -             | 50.5 ± 12.0   |
| <b>Double-Sham</b>   | 61.0 ± 9.6      | -             | 55.7 ± 10.2   | -             | 51.4 ± 13.5   |

*Note.* STAI-S: State-Trait Anxiety Inventory – State <sup>7</sup> (range: 20-80; sign: positive; minimally significant score: >39). Values are means ± SD.

**eTable 13. STAI-T at various timepoints.**

| <b>Group</b>         | <b>Baseline</b> | <b>Week 2</b> | <b>Week 3</b> | <b>Week 4</b> | <b>Week 6</b> |
|----------------------|-----------------|---------------|---------------|---------------|---------------|
| <b>Double-Active</b> | 67.7 ± 5.9      | -             | 60.4 ± 8.4    | -             | 56.9 ± 10.6   |
| <b>tDCS-only</b>     | 68.0 ± 7.6      | -             | 62.0 ± 11.0   | -             | 57.0 ± 11.6   |
| <b>Double-Sham</b>   | 67.9 ± 8.3      | -             | 60.1 ± 10.2   | -             | 56.2 ± 12.6   |

*Note.* STAI-T: State-Trait Anxiety Inventory – Trait <sup>7</sup> (range: 20-80; sign: positive; minimally significant score: >39). Values are means ± SD.

**eTable 14. Average usability scores at various time-points.**

| <b>Average score/week</b> | <b>Double-Active<br/>(N=63)</b> | <b>tDCS-only<br/>(N=72)</b> | <b>Double-Sham<br/>(N=70)</b> |
|---------------------------|---------------------------------|-----------------------------|-------------------------------|
| <b>Week 1</b>             | 79.4 ± 19.3                     | 85.8 ± 18.9                 | 85.3 ± 18.5                   |
| <b>Week 2</b>             | 90.5 ± 13.1                     | 93.2 ± 12.4                 | 93.5 ± 11.6                   |
| <b>Week 3</b>             | 90.4 ± 14.4                     | 93.9 ± 11.8                 | 93.0 ± 11.8                   |
| <b>Week 4</b>             | 92.1 ± 11.6                     | 95.5 ± 9.4                  | 93.6 ± 12.6                   |
| <b>Week 5</b>             | 84.9 ± 18.2                     | 77.7 ± 22.7                 | 77.7 ± 22.3                   |
| <b>Week 6</b>             | 94.6 ± 7.0                      | 93.8 ± 14.0                 | 94.6 ± 7.6                    |

*Note. Usability scores based on a visual analog scale (VAS) created for this study (range: 0-100; sign positive). Values are means ± SD.*

**eTable 15. Adverse events and serious adverse events at week 6.**

| Event                                                                        | Double-Active<br>(N=61) | tDCS-only<br>(N=69) | Double-Sham<br>(N=69) |
|------------------------------------------------------------------------------|-------------------------|---------------------|-----------------------|
| <b>Severity of reported adverse events at week 6 — no. (%)</b>               |                         |                     |                       |
| No adverse event reported                                                    | < 10 (*)                | 15 (22)             | 15 (22)               |
| ≥ 1 mild adverse event                                                       | 46 (75)                 | 50 (72)             | 47 (68)               |
| ≥ 1 moderate adverse event                                                   | 19 (31)                 | 24 (35)             | 14 (20)               |
| ≥ 1 severe adverse event                                                     | < 10 (*)                | < 10 (*)            | < 10 (*)              |
| <b>Median no. of reported adverse events at week 6 (interquartile range)</b> |                         |                     |                       |
| Mild adverse events                                                          | 1 (1-3)                 | 2 (0-3)             | 1 (0-2)               |
| Moderate adverse events                                                      | 0 (0-1)                 | 0 (0-1)             | 0 (0-0)               |
| Severe adverse events                                                        | 0 (0-0)                 | 0 (0-0)             | 0 (0-0)               |
| <b>Serious adverse events during the trial – no. (%)</b>                     |                         |                     |                       |
| New-onset mania                                                              | 0 (0)                   | 0 (0)               | 0 (0)                 |



|                                              |       |          |          |
|----------------------------------------------|-------|----------|----------|
| <b>or hypomania</b>                          |       |          |          |
| <b>Suicidal ideation</b>                     | 0 (0) | < 10 (*) | < 10 (*) |
| <b>Suicide attempt</b>                       | 0 (0) | < 10 (*) | < 10 (*) |
| <b>Hospitalization for psychiatric cause</b> | 0 (0) | 0 (0)    | 0 (0)    |
| <b>Total serious adverse events</b>          | 0 (0) | < 10 (*) | < 10 (*) |

*Note.* All adverse events that were at least remotely associated with the intervention were included. Values for the groups represent absolute numbers and percentages in parentheses. (\*) Due to data identifiability requirements, < 10 is reported where N < 10.

**eTable 16. Individual adverse events at week 6.**

| <b>Event</b>         | <b>Double-Active</b> | <b>tDCS-only</b> | <b>Double-Sham</b> |
|----------------------|----------------------|------------------|--------------------|
| <b>Tingling</b>      |                      |                  |                    |
| <i>Mild</i>          | 21 (34)              | 20 (29)          | 28 (41)            |
| <i>Moderate</i>      | < 10 (*)             | < 10 (*)         | < 10 (*)           |
| <i>Severe</i>        | 0 (0)                | 0 (0)            | 0 (0)              |
| <b>Local redness</b> |                      |                  |                    |
| <i>Mild</i>          | 29 (48)              | 26 (38)          | 11 (16)            |
| <i>Moderate</i>      | < 10 (*)             | < 10 (*)         | 0 (0)              |
| <i>Severe</i>        | < 10 (*)             | 0 (0)            | 0 (0)              |
| <b>Heat/Burning</b>  |                      |                  |                    |
| <i>Mild</i>          | 14 (23)              | 21 (30)          | 11 (16)            |

| <b>Event</b>                      | <b>Double-Active</b> | <b>tDCS-only</b> | <b>Double-Sham</b> |
|-----------------------------------|----------------------|------------------|--------------------|
| <i>Moderate</i>                   | < 10 (*)             | < 10 (*)         | < 10 (*)           |
| <i>Severe</i>                     | < 10 (*)             | 0 (0)            | 0 (0)              |
| <b>Somnolence</b>                 |                      |                  |                    |
| <i>Mild</i>                       | 11 (18)              | 19 (28)          | 12 (17)            |
| <i>Moderate</i>                   | < 10 (*)             | < 10 (*)         | < 10 (*)           |
| <i>Severe</i>                     | < 10 (*)             | < 10 (*)         | 0 (0)              |
| <b>Itching</b>                    |                      |                  |                    |
| <i>Mild</i>                       | 11 (18)              | 13 (19)          | 18 (26)            |
| <i>Moderate</i>                   | < 10 (*)             | < 10 (*)         | < 10 (*)           |
| <i>Severe</i>                     | 0 (0)                | 0 (0)            | 0 (0)              |
| <b>Headache</b>                   |                      |                  |                    |
| <i>Mild</i>                       | < 10 (*)             | < 10 (*)         | < 10 (*)           |
| <i>Moderate</i>                   | < 10 (*)             | < 10 (*)         | < 10 (*)           |
| <i>Severe</i>                     | 0 (0)                | 0 (0)            | 0 (0)              |
| <b>Concentration difficulties</b> |                      |                  |                    |
| <i>Mild</i>                       | < 10 (*)             | < 10 (*)         | < 10 (*)           |
| <i>Moderate</i>                   | < 10 (*)             | < 10 (*)         | < 10 (*)           |
| <i>Severe</i>                     | 0 (0)                | 0 (0)            | 0 (0)              |
| <b>Fatigue</b>                    |                      |                  |                    |
| <i>Mild</i>                       | < 10 (*)             | < 10 (*)         | < 10 (*)           |
| <i>Moderate</i>                   | 0 (0)                | < 10 (*)         | < 10 (*)           |
| <i>Severe</i>                     | < 10 (*)             | < 10 (*)         | < 10 (*)           |
| <b>Buzzing</b>                    |                      |                  |                    |
| <i>Mild</i>                       | < 10 (*)             | < 10 (*)         | < 10 (*)           |
| <i>Moderate</i>                   | < 10 (*)             | < 10 (*)         | 0 (0)              |
| <i>Severe</i>                     | 0 (0)                | 0 (0)            | 0 (0)              |

| <b>Event</b>                  | <b>Double-Active</b> | <b>tDCS-only</b> | <b>Double-Sham</b> |
|-------------------------------|----------------------|------------------|--------------------|
| <b>Pain on the left side</b>  |                      |                  |                    |
| <i>Mild</i>                   | < 10 (*)             | < 10 (*)         | < 10 (*)           |
| <i>Moderate</i>               | 0 (0)                | 2 (3)            | 0 (0)              |
| <i>Severe</i>                 | 0 (0)                | 0 (0)            | 0 (0)              |
| <b>Pain on the right side</b> |                      |                  |                    |
| <i>Mild</i>                   | < 10 (*)             | < 10 (*)         | < 10 (*)           |
| <i>Moderate</i>               | 0 (0)                | 0 (0)            | 0 (0)              |
| <i>Severe</i>                 | 0 (0)                | 0 (0)            | 0 (0)              |
| <b>Dizziness</b>              |                      |                  |                    |
| <i>Mild</i>                   | < 10 (*)             | < 10 (*)         | < 10 (*)           |
| <i>Moderate</i>               | < 10 (*)             | < 10 (*)         | 0 (0)              |
| <i>Severe</i>                 | 0 (0)                | 0 (0)            | < 10 (*)           |
| <b>Mood worsening</b>         |                      |                  |                    |
| <i>Mild</i>                   | 0 (0)                | < 10 (*)         | < 10 (*)           |
| <i>Moderate</i>               | < 10 (*)             | < 10 (*)         | < 10 (*)           |
| <i>Severe</i>                 | 0 (0)                | 0 (0)            | 0 (0)              |
| <b>Nausea</b>                 |                      |                  |                    |
| <i>Mild</i>                   | 0 (0)                | < 10 (*)         | < 10 (*)           |
| <i>Moderate</i>               | 0 (0)                | < 10 (*)         | 0 (0)              |
| <i>Severe</i>                 | 0 (0)                | 0 (0)            | 0 (0)              |
| <b>Neck ache</b>              |                      |                  |                    |
| <i>Mild</i>                   | < 10 (*)             | 0 (0)            | < 10 (*)           |
| <i>Moderate</i>               | < 10 (*)             | 0 (0)            | 0 (0)              |
| <i>Severe</i>                 | 0 (0)                | 0 (0)            | 0 (0)              |

*Note.* All adverse events that were at least remotely associated with the intervention are shown, ordered from most to least common. Values for the groups represent absolute numbers and percentages in parentheses. (\*) Due to data identifiability requirements, < 10 is reported where N < 10.



**eTable 17. Adverse events per week**

| <b>Event</b>                      | <b>Double-Active</b> | <b>tDCS-only</b> | <b>Double-Sham</b> |
|-----------------------------------|----------------------|------------------|--------------------|
| <b>Week 1</b>                     |                      |                  |                    |
| <i>Local redness</i>              | 39 (62)              | 34 (47)          | 10 (14)            |
| <i>Tingling</i>                   | 30 (48)              | 29 (40)          | 30 (43)            |
| <i>Heat/Burning</i>               | 25 (40)              | 21 (29)          | < 10 (*)           |
| <i>Somnolence</i>                 | 21 (33)              | 21 (29)          | 22 (31)            |
| <i>Headache</i>                   | 21 (33)              | 20 (28)          | 22 (31)            |
| <i>Concentration difficulties</i> | < 10 (*)             | 10 (14)          | < 10 (*)           |
| <i>Fatigue</i>                    | < 10 (*)             | < 10 (*)         | < 10 (*)           |
| <i>Pain at the left side</i>      | < 10 (*)             | < 10 (*)         | < 10 (*)           |
| <i>Buzzing</i>                    | < 10 (*)             | < 10 (*)         | < 10 (*)           |
| <i>Pain on the right side</i>     | < 10 (*)             | < 10 (*)         | < 10 (*)           |
| <i>Dizziness</i>                  | < 10 (*)             | < 10 (*)         | < 10 (*)           |
| <i>Mood worsening</i>             | < 10 (*)             | < 10 (*)         | < 10 (*)           |
| <i>Nausea</i>                     | < 10 (*)             | < 10 (*)         | < 10 (*)           |
| <i>Neck ache</i>                  | 0 (0)                | < 10 (*)         | < 10 (*)           |
| <b>Week 2</b>                     |                      |                  |                    |
| <i>Local redness</i>              | 40 (63)              | 43 (60)          | 11 (16)            |

| <b>Event</b>                             | <b>Double-Active</b> | <b>tDCS-only</b> | <b>Double-Sham</b> |
|------------------------------------------|----------------------|------------------|--------------------|
| <i><b>Tingling</b></i>                   | 22 (35)              | 36 (50)          | 32 (46)            |
| <i><b>Heat/Burning</b></i>               | 30 (48)              | 27 (38)          | 10 (14)            |
| <i><b>Somnolence</b></i>                 | 19 (30)              | 22 (31)          | 21 (30)            |
| <i><b>Itching</b></i>                    | 22 (35)              | 22 (31)          | 22 (31)            |
| <i><b>Headache</b></i>                   | 14 (22)              | 16 (22)          | 18 (26)            |
| <i><b>Concentration difficulties</b></i> | < 10 (*)             | 10 (14)          | 10 (14)            |
| <i><b>Fatigue</b></i>                    | < 10 (*)             | < 10 (*)         | 10 (14)            |
| <i><b>Pain at the left side</b></i>      | 11 (17)              | < 10 (*)         | < 10 (*)           |
| <i><b>Buzzing</b></i>                    | < 10 (*)             | < 10 (*)         | < 10 (*)           |
| <i><b>Pain on the right side</b></i>     | < 10 (*)             | < 10 (*)         | < 10 (*)           |
| <i><b>Dizziness</b></i>                  | < 10 (*)             | < 10 (*)         | < 10 (*)           |
| <i><b>Mood worsening</b></i>             | < 10 (*)             | < 10 (*)         | < 10 (*)           |
| <i><b>Nausea</b></i>                     | < 10 (*)             | < 10 (*)         | < 10 (*)           |
| <i><b>Neck ache</b></i>                  | < 10 (*)             | < 10 (*)         | < 10 (*)           |
| <b>Week 3</b>                            |                      |                  |                    |
| <i><b>Local redness</b></i>              | 35 (56)              | 38 (55)          | 11 (15)            |
| <i><b>Tingling</b></i>                   | 21 (33)              | 29 (42)          | 28 (39)            |
| <i><b>Heat/Burning</b></i>               | 24 (38)              | 25 (36)          | < 10 (*)           |
| <i><b>Somnolence</b></i>                 | 21 (33)              | 24 (35)          | 20 (28)            |

| <b>Event</b>                      | <b>Double-Active</b> | <b>tDCS-only</b> | <b>Double-Sham</b> |
|-----------------------------------|----------------------|------------------|--------------------|
| <i>Itching</i>                    | 19 (30)              | 18 (26)          | 24 (33)            |
| <i>Headache</i>                   | 14 (22)              | 14 (20)          | 14 (19)            |
| <i>Concentration difficulties</i> | < 10 (*)             | < 10 (*)         | < 10 (*)           |
| <i>Fatigue</i>                    | < 10 (*)             | < 10 (*)         | < 10 (*)           |
| <i>Pain at the left side</i>      | < 10 (*)             | < 10 (*)         | < 10 (*)           |
| <i>Buzzing</i>                    | < 10 (*)             | < 10 (*)         | < 10 (*)           |
| <i>Pain on the right side</i>     | < 10 (*)             | < 10 (*)         | < 10 (*)           |
| <i>Dizziness</i>                  | < 10 (*)             | < 10 (*)         | < 10 (*)           |
| <i>Mood worsening</i>             | < 10 (*)             | < 10 (*)         | < 10 (*)           |
| <i>Nausea</i>                     | 0 (0)                | < 10 (*)         | < 10 (*)           |
| <i>Neck ache</i>                  | < 10 (*)             | 0 (0)            | < 10 (*)           |
| <b>Week 4</b>                     |                      |                  |                    |
| <i>Local redness</i>              | 36 (58)              | 32 (47)          | < 10 (*)           |
| <i>Tingling</i>                   | 25 (40)              | 24 (35)          | 26 (37)            |
| <i>Heat/Burning</i>               | 24 (39)              | 25 (37)          | 14 (20)            |
| <i>Somnolence</i>                 | 17 (27)              | 23 (34)          | 15 (21)            |
| <i>Itching</i>                    | 20 (32)              | 15 (22)          | 25 (36)            |
| <i>Headache</i>                   | 11 (18)              | 9 (13)           | 8 (11)             |
| <i>Concentration difficulties</i> | 8 (13)               | 7 (10)           | < 10 (*)           |

| <b>Event</b>                      | <b>Double-Active</b> | <b>tDCS-only</b> | <b>Double-Sham</b> |
|-----------------------------------|----------------------|------------------|--------------------|
| <i>Fatigue</i>                    | < 10 (*)             | 10 (15)          | 10 (14)            |
| <i>Pain at the left side</i>      | < 10 (*)             | < 10 (*)         | < 10 (*)           |
| <i>Buzzing</i>                    | < 10 (*)             | < 10 (*)         | < 10 (*)           |
| <i>Pain on the right side</i>     | < 10 (*)             | < 10 (*)         | < 10 (*)           |
| <i>Dizziness</i>                  | < 10 (*)             | < 10 (*)         | < 10 (*)           |
| <i>Mood worsening</i>             | < 10 (*)             | < 10 (*)         | < 10 (*)           |
| <i>Nausea</i>                     | 0 (0)                | < 10 (*)         | < 10 (*)           |
| <i>Neck ache</i>                  | < 10 (*)             | < 10 (*)         | < 10 (*)           |
| <b>Week 5</b>                     |                      |                  |                    |
| <i>Local redness</i>              | 31 (51)              | 31 (47)          | 9 (14)             |
| <i>Tingling</i>                   | 18 (30)              | 20 (30)          | 25 (38)            |
| <i>Heat/Burning</i>               | 23 (38)              | 18 (27)          | 12 (18)            |
| <i>Somnolence</i>                 | 15 (25)              | 20 (30)          | 12 (18)            |
| <i>Itching</i>                    | 18 (30)              | 15 (23)          | 19 (29)            |
| <i>Headache</i>                   | < 10 (*)             | < 10 (*)         | < 10 (*)           |
| <i>Concentration difficulties</i> | < 10 (*)             | < 10 (*)         | < 10 (*)           |
| <i>Fatigue</i>                    | < 10 (*)             | < 10 (*)         | < 10 (*)           |
| <i>Pain at the left side</i>      | < 10 (*)             | < 10 (*)         | < 10 (*)           |
| <i>Buzzing</i>                    | < 10 (*)             | < 10 (*)         | < 10 (*)           |



| <b>Event</b>                      | <b>Double-Active</b> | <b>tDCS-only</b> | <b>Double-Sham</b> |
|-----------------------------------|----------------------|------------------|--------------------|
| <i>Pain on the right side</i>     | < 10 (*)             | < 10 (*)         | < 10 (*)           |
| <i>Dizziness</i>                  | < 10 (*)             | < 10 (*)         | < 10 (*)           |
| <i>Mood worsening</i>             | < 10 (*)             | < 10 (*)         | < 10 (*)           |
| <i>Nausea</i>                     | 0 (0)                | 0 (0)            | < 10 (*)           |
| <i>Neck ache</i>                  | < 10 (*)             | < 10 (*)         | < 10 (*)           |
| <b>Week 6</b>                     |                      |                  |                    |
| <i>Local redness</i>              | 34 (56)              | 33 (48)          | 11 (16)            |
| <i>Tingling</i>                   | 23 (38)              | 24 (35)          | 33 (48)            |
| <i>Heat/Burning</i>               | 23 (38)              | 24 (35)          | 13 (19)            |
| <i>Somnolence</i>                 | 19 (31)              | 25 (36)          | 16 (23)            |
| <i>Itching</i>                    | 14 (23)              | 17 (25)          | 21 (30)            |
| <i>Headache</i>                   | < 10 (*)             | 13 (19)          | < 10 (*)           |
| <i>Concentration difficulties</i> | < 10 (*)             | < 10 (*)         | < 10 (*)           |
| <i>Fatigue</i>                    | < 10 (*)             | < 10 (*)         | < 10 (*)           |
| <i>Pain at the left side</i>      | < 10 (*)             | < 10 (*)         | < 10 (*)           |
| <i>Buzzing</i>                    | < 10 (*)             | < 10 (*)         | < 10 (*)           |
| <i>Pain on the right side</i>     | < 10 (*)             | < 10 (*)         | < 10 (*)           |
| <i>Dizziness</i>                  | < 10 (*)             | < 10 (*)         | < 10 (*)           |
| <i>Mood worsening</i>             | < 10 (*)             | < 10 (*)         | < 10 (*)           |

| <b>Event</b>            | <b>Double-Active</b> | <b>tDCS-only</b> | <b>Double-Sham</b> |
|-------------------------|----------------------|------------------|--------------------|
| <b><i>Nausea</i></b>    | 0 (0)                | < 10 (*)         | < 10 (*)           |
| <b><i>Neck ache</i></b> | < 10 (*)             | 0 (0)            | < 10 (*)           |

*Note.* All adverse events that were at least remotely associated with the intervention are shown. Values for the groups represent absolute numbers and percentages in parentheses. (\*) Due to data identifiability requirements, < 10 is reported where N <10.

**eFigure 3.** tDCS stimulation time (average minutes per week per participant).

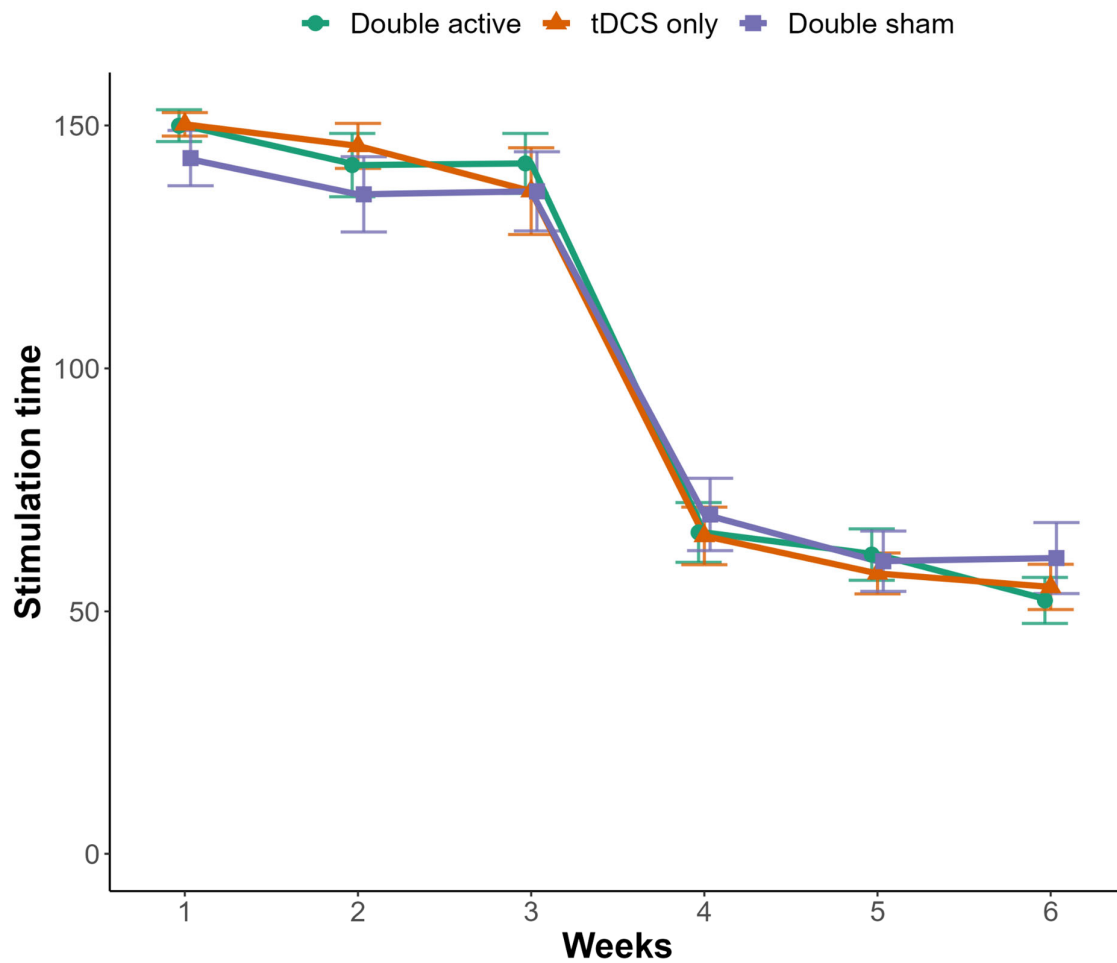

*Note.* During the first 3 weeks, participants were instructed to apply 5 stimulation sessions per week, and from week 4 onwards, 2 sessions per week. This is reflected in a drop of stimulation times between weeks 3 and 4. Error bars represent 95% confidence intervals.

**eTable 18. Reasons for dropout.**

| Dropouts                               | Double-Active<br>(N=64) | tDCS-only<br>(N=73) | Double-Sham<br>(N=73) |
|----------------------------------------|-------------------------|---------------------|-----------------------|
|                                        | < 10 (*)                | < 10 (*)            | < 10 (*)              |
| <b>Mobile tDCS-related</b>             | < 10 (*)                | 0 (0)               | (0)                   |
| <b>Suicidal ideation</b>               | 0 (0)                   | < 10 (*)            | < 10 (*)              |
| <b>Suicide attempt</b>                 | 0 (0)                   | < 10 (*)            | 0 (0)                 |
| <b>Psychotic symptoms</b>              | 0 (0)                   | 0 (0)               | 0 (0)                 |
| <b>Hypo(manic) switch</b>              | 0 (0)                   | 0 (0)               | 0 (0)                 |
| <b>Serious clinical adverse events</b> | 0 (0)                   | 0 (0)               | 0 (0)                 |
| <b>Non-adherence to study protocol</b> | 0 (0)                   | 0 (0)               | 0 (0)                 |
| <b>Missed consecutive evaluations</b>  | 0 (0)                   | 0 (0)               | 1 (1.4)               |
| <b>Other non-specific reasons</b>      | < 10 (*)                | < 10 (*)            | < 10 (*)              |

Note. Values are absolute numbers with percentages in parentheses. (\*) Due to data identifiability requirements, < 10 is reported where N <10.

## eReferences

1. Borrione L, Suen PJC, Razza LB, Santos LAD, Sudbrack-Oliveira P, Brunoni AR. The Flow brain stimulation headset for the treatment of depression: overview of its safety, efficacy and portable design. *Expert Rev Med Devices*. 2020;17(9):867-878.
2. Montgomery SA, Asberg M. A new depression scale designed to be sensitive to change. *Br J Psychiatry*. 1979;134:382-389.
3. Beck AT, Steer RA, Brown GK. *BDI-II, Beck Depression Inventory: Manual*. Psychological Corporation; 1996.
4. Hamilton M. The assessment of anxiety states by rating. *Br J Med Psychol*. 1959;32(1):50-55.
5. Kadouri A, Corruble E, Falissard B. The improved Clinical Global Impression Scale (iCGI): development and validation in depression. *BMC Psychiatry*. 2007;7:7.
6. Pires P, Filgueiras A, Ribas R, Santana C. Positive and negative affect schedule: psychometric properties for the Brazilian Portuguese version. *Span J Psychol*. 2013;16:E58.
7. Andrade L, Gorenstein C, Vieira Filho AH. Psychometric properties of the Portuguese version of the State-Trait Anxiety Inventory applied to college students: factor analysis and relation to the Beck .... *Brazilian Journal of*. Published online 2001. [https://www.scielo.br/scielo.php?pid=S0100-879X2001000300011&script=sci\\_arttext](https://www.scielo.br/scielo.php?pid=S0100-879X2001000300011&script=sci_arttext)
8. Magnusson K. *Powerlmm: Powerlmm R Package for Power Calculations for Two- and Three-Level Longitudinal Multilevel/linear Mixed Models*. Github Accessed October 27, 2023. <https://github.com/rpsychologist/powerlmm>
9. Young RC, Biggs JT, Ziegler VE, Meyer DA. A rating scale for mania: reliability, validity and sensitivity. *Br J Psychiatry*. 1978;133:429-435.
