# Supplementary material
Source: PubMed Central journal article supplement (PMC10765312)
Supplement: jamapsychiatry-e234948-s003.pdf [file jamapsychiatry-e234948-s003.pdf]

## Data Sharing Statement

Borrione. Home-Use Transcranial Direct Current Stimulation for the Treatment of a Major Depressive Episode. *JAMA Psychiatry*. Published January 03, 2024.

doi:10.1001/jamapsychiatry.2023.4948

### Data

**Data available:** Yes

**Data types:** Deidentified participant data, Data dictionary, Other (please specify)

**Additional Information:** Reproducible scripts

**How to access data:** Anonymized data, a codebook, reproducible scripts, as well as further Supplementary Materials will be available after 6 months of publication in osf.io.

**When available:** With publication

### Supporting Documents

**Document types:** Statistical/analytic code

**How to access documents:** Anonymized data, a codebook, reproducible scripts, as well as further Supplementary Materials will be available after 6 months of publication in osf.io.

**When available:** With publication

### Additional Information

**Who can access the data:** Anyone requesting the data.

**Types of analyses:** For any purpose.

**Mechanisms of data availability:** Without investigator support.
